# Supplementary material for: Association between polymorphisms of the adenylate cyclase 3 gene rs2241759 and the effect of high-intensity interval training on blood lipid profiles
Source: PeerJ. 2025 Apr 11;13:e19271. doi: 10.7717/peerj.19271 (PMC11995890; doi:10.7717/peerj.19271)
Supplement: Supplemental Information 1 [file peerj-13-19271-s001.xlsx]

## Sheet: Sheet1
number	gender	nationality	major	test location	Height（cm） in front	Height（cm） after	changes	change rate	weight（kg） in front	weight（kg） after	changes	change rate	Pre total cholesterol(mmol/L)	Post total cholesterol(mmol/L)	changes	change rate	Pre glucose(mmol/L)	Post glucose(mmol/L)	changes	change rate	Pre high density lipoprotein(mmol/L)	Post high density lipoprotein(mmol/L)	changes	change rate	Pre low-density lipoprotein(mmol/L)	Post low-density lipoprotein(mmol/L)	changes	change rate	Pre triglyceride(mmol/L)	Post triglyceride(mmol/L)	changes	change rate
H1	male	Han	non-majoring sport	Anqing normal university	169	169	0	0	74	74.4	0.4	-0.00540541	5.01	5.87	0.86	-0.171657	5.53	5.64	0.11	-0.0198915	1.16	1.6	0.44	-0.37931	3.12	3.13	0.01	-0.00320513	1.4	1.31	-0.09	0.0642857
H2	female	Han	non-majoring sport	Anqing normal university	156	156	0	0	47.1	46.1	-1	0.0212314	3.3	3.91	0.61	-0.184848	4.86	4.92	0.06	-0.0123457	1.34	1.59	0.25	-0.186567	1.85	1.94	0.09	-0.0486486	0.89	1.06	0.17	-0.191011
H3	female	Han	non-majoring sport	Anqing normal university	153	153	0	0	46.4	46.8	0.4	-0.00862069	3.35	3.45	0.1	-0.0298507	2.58	5.49	2.91	-1.12791	0.96	1.21	0.25	-0.260417	2.08	1.81	-0.27	0.129808	1.22	1.17	-0.05	0.0409836
H4	male	Han	non-majoring sport	Anqing normal university	176	176	0	0	73.2	72.8	-0.4	0.00546448	3.99	3.31	-0.68	0.170426	5.38	5.68	0.3	-0.0557621	1.22	1.27	0.05	-0.0409836	2.49	1.82	-0.67	0.269076	1.37	1.07	-0.3	0.218978
H5	female	Han	non-majoring sport	Anqing normal university	169	169	0	0	70.6	69.3	-1.3	0.0184136	3.69	3.1	-0.59	0.159892	4.76	5.25	0.49	-0.102941	1.68	1.38	-0.3	0.178571	1.96	1.33	-0.63	0.321429	0.91	0.72	-0.19	0.208791
H6	female	Han	non-majoring sport	Anqing normal university	160	160	0	0	49.5	51.7	2.2	-0.0444444	4.18	5.08	0.9	-0.215311	5.1	5.3	0.2	-0.0392157	1.6	2.15	0.55	-0.34375	2.27	2.54	0.27	-0.118943	1.47	0.68	-0.79	0.537415
H7	male	Han	non-majoring sport	Anqing normal university	182	182	0	0	65.7	63	-2.7	0.0410959	4.18	4.09	-0.09	0.0215311	5.12	5.34	0.22	-0.0429688	1.52	1.75	0.23	-0.151316	2.45	1.92	-0.53	0.216327	1.16	0.64	-0.52	0.448276
H8	female	Han	non-majoring sport	Anqing normal university	163	163	0	0	55.8	57.4	1.6	-0.0286738	3.76	5.14	1.38	-0.367021	5.47	5.18	-0.29	0.0530165	1.22	2.13	0.91	-0.745902	2.22	2.51	0.29	-0.130631	1.73	1.05	-0.68	0.393064
H9	male	Han	non-majoring sport	Anqing normal university	169	169	0	0	62.6	63.1	0.5	-0.00798722	4.03	4.79	0.76	-0.188586	5.46	5.23	-0.23	0.0421245	1.37	1.7	0.33	-0.240876	2.46	2.63	0.17	-0.0691057	1.34	1.33	-0.01	0.00746269
H10	female	Han	non-majoring sport	Anqing normal university	155	155	0	0	55.4	57.2	1.8	-0.032491	4.11	4.87	0.76	-0.184915	5.19	5.36	0.17	-0.0327553	1.1	1.72	0.62	-0.563636	2.3	2.59	0.29	-0.126087	3.11	1.26	-1.85	0.594855
H12	female	Han	non-majoring sport	Anqing normal university	164	164	0	0	54	57.3	3.3	-0.0611111	4.17	3.99	-0.18	0.0431655	5.39	5.12	-0.27	0.0500928	1.56	1.63	0.07	-0.0448718	2.42	2.01	-0.41	0.169421	0.92	0.56	-0.36	0.391304
H13	male	Han	non-majoring sport	Anqing normal university	175	175	0	0	65.7	62.5	-3.2	0.0487062	4.37	3.53	-0.84	0.19222	5.57	5.89	0.32	-0.0574506	1.28	1.43	0.15	-0.117188	2.91	1.87	-1.04	0.357388	1	0.71	-0.29	0.29
H14	male	Han	non-majoring sport	Anqing normal university	187	187	0	0	83.6	78.4	-5.2	0.062201	4.46	3.82	-0.64	0.143498	5.33	5.16	-0.17	0.0318949	1.9	1.59	-0.31	0.163158	2.7	1.87	-0.83	0.307407	0.7	0.41	-0.29	0.414286
H15	female	Han	non-majoring sport	Anqing normal university	158	158	0	0	45.2	47.2	2	-0.0442478	3.98	4.87	0.89	-0.223618	5.01	5.42	0.41	-0.0818363	1.55	2.05	0.5	-0.322581	2.26	2.44	0.18	-0.079646	0.74	0.83	0.09	-0.121622
H16	female	Han	non-majoring sport	Anqing normal university	156	156	0	0	47.3	47.9	0.6	-0.012685	4.97	5.29	0.32	-0.0643863	5.23	5.34	0.11	-0.0210325	1.23	2.03	0.8	-0.650407	3.17	2.63	-0.54	0.170347	1.58	1.86	0.28	-0.177215
H17	male	Han	non-majoring sport	Anqing normal university	181	181	0	0	69.3	70.3	1	-0.01443	4.33	4.7	0.37	-0.0854503	5.24	5.43	0.19	-0.0362595	1.34	1.62	0.28	-0.208955	2.47	2.35	-0.12	0.048583	1.3	1.57	0.27	-0.207692
H18	female	Han	non-majoring sport	Anqing normal university	164	164	0	0	52.4	55.3	2.9	-0.0553435	4.34	3.73	-0.61	0.140553	5.55	4.76	-0.79	0.142342	1.27	1.37	0.1	-0.0787402	2.64	1.94	-0.7	0.265152	1.46	0.92	-0.54	0.369863
H19	female	Han	non-majoring sport	Anqing normal university	168	168	0	0	60.9	60.5	-0.4	0.00656814	4.12	3.73	-0.39	0.0946602	5.91	5.81	-0.1	0.0169205	1.44	1.52	0.08	-0.0555556	2.47	1.88	-0.59	0.238866	1.28	0.5	-0.78	0.609375
H20	female	Han	non-majoring sport	Anqing normal university	165	165	0	0	58.2	55.4	-2.8	0.04811	4.07	4.53	0.46	-0.113022	5.23	5.2	-0.03	0.00573614	1.5	1.84	0.34	-0.226667	2.48	2.22	-0.26	0.104839	0.92	0.89	-0.03	0.0326087
H21	male	Han	non-majoring sport	Anqing normal university	170	170	0	0	64.2	57	-7.2	0.11215	3.96	4.25	0.29	-0.0732323	5.15	5.14	-0.01	0.00194175	1.31	1.69	0.38	-0.290076	2.36	2.16	-0.2	0.0847458	1.08	0.78	-0.3	0.277778
H22	male	Han	non-majoring sport	Anqing normal university	184	184	0	0	102.1	97.2	-4.9	0.0479922	4.76	3.9	-0.86	0.180672	5.21	5.64	0.43	-0.0825336	1.55	1.56	0.01	-0.00645161	3.04	1.91	-1.13	0.371711	1.07	1.26	0.19	-0.17757
H23	female	Han	non-majoring sport	Anqing normal university	173	173	0	0	57.4	62.8	5.4	-0.0940767	5.39	5.43	0.04	-0.00742115	3.45	4.94	1.49	-0.431884	2.04	2.35	0.31	-0.151961	3.31	2.61	-0.7	0.21148	0.97	0.88	-0.09	0.0927835
H24	male	Han	non-majoring sport	Anqing normal university	171	171	0	0	70.6	69.1	-1.5	0.0212465	5.33	5.41	0.08	-0.0150094	5.88	6.12	0.24	-0.0408163	0.96	1.51	0.55	-0.572917	3.54	3.16	-0.38	0.107345	1.25	1.13	-0.12	0.096
H25	female	Han	non-majoring sport	Anqing normal university	155	155	0	0	51	50.2	-0.8	0.0156863	5.44	4.67	-0.77	0.141544	5.05	5.06	0.01	-0.0019802	2.14	1.81	-0.33	0.154206	3.15	2.32	-0.83	0.263492	0.84	0.96	0.12	-0.142857
H26	male	Han	non-majoring sport	Anqing normal university	167	167	0	0	67	64.8	-2.2	0.0328358	4.86	5.4	0.54	-0.111111	4.77	5.24	0.47	-0.0985325	1.27	1.88	0.61	-0.480315	3.06	2.89	-0.17	0.0555556	1.23	1.11	-0.12	0.097561
H27	female	Han	non-majoring sport	Anqing normal university	153	153	0	0	43.6	47.9	4.3	-0.0986239	4.36	4.84	0.48	-0.110092	5.81	5.96	0.15	-0.0258176	2.02	2.25	0.23	-0.113861	2.56	2.4	-0.16	0.0625	0.85	0.64	-0.21	0.247059
H28	male	Han	non-majoring sport	Anqing normal university	170	170	0	0	57.9	58	0.1	-0.00172712	3.91	4.11	0.2	-0.0511509	0.86	5.74	4.88	-5.67442	1.35	1.64	0.29	-0.214815	2.52	2.19	-0.33	0.130952	1.13	0.97	-0.16	0.141593
H29	female	Han	non-majoring sport	Anqing normal university	162	162	0	0	57.1	56.8	-0.3	0.00525394	4.21	4.38	0.17	-0.04038	5.4	5.49	0.09	-0.0166667	1.64	1.96	0.32	-0.195122	2.42	2.14	-0.28	0.115702	0.8	0.67	-0.13	0.1625
H30	male	Han	non-majoring sport	Anqing normal university	179	179	0	0	72.7	72.6	-0.1	0.00137552	3.19	3.6	0.41	-0.128527	5.41	5.66	0.25	-0.0462107	1.27	1.55	0.28	-0.220472	1.95	1.75	-0.2	0.102564	1.17	0.98	-0.19	0.162393
H31	female	Han	non-majoring sport	Anqing normal university	169	169	0	0	55.9	54.8	-1.1	0.019678	4.24	4.75	0.51	-0.120283	5.32	4.66	-0.66	0.12406	1.56	1.93	0.37	-0.237179	2.37	2.39	0.02	-0.00843882	1.1	0.6	-0.5	0.454545
H32	male	Han	non-majoring sport	Anqing normal university	176	176	0	0	55.6	55.6	0	0	3.37	4.07	0.7	-0.207715	5.09	5.4	0.31	-0.0609037	1.56	1.79	0.23	-0.147436	1.88	1.89	0.01	-0.00531915	1.11	1.12	0.01	-0.00900901
H33	female	Han	non-majoring sport	Anqing normal university	163	163	0	0	67.2	66.3	-0.9	0.0133929	4.08	5.21	1.13	-0.276961	0.66	5.28	4.62	-7	1.25	1.81	0.56	-0.448	2.53	2.79	0.26	-0.102767	1.28	0.87	-0.41	0.320312
H35	female	Han	non-majoring sport	Anqing normal university	160	160	0	0	52.7	49.9	-2.8	0.0531309	4.66	4.77	0.11	-0.0236052	5.18	5.23	0.05	-0.00965251	2.12	2.09	-0.03	0.0141509	2.37	2.18	-0.19	0.0801688	0.98	0.65	-0.33	0.336735
H36	male	Han	non-majoring sport	Anqing normal university	178	178	0	0	66.6	69	2.4	-0.036036	4	4.61	0.61	-0.1525	5.02	5.55	0.53	-0.105578	1.28	1.49	0.21	-0.164062	2.35	2.52	0.17	-0.0723404	1.62	1.21	-0.41	0.253086
H38	male	Han	non-majoring sport	Anqing normal university	170	170	0	0	61	60	-1	0.0163934	5.67	5.22	-0.45	0.0793651	5.61	5.45	-0.16	0.0285205	1.3	1.48	0.18	-0.138462	3.47	2.88	-0.59	0.170029	1.84	1.35	-0.49	0.266304
H39	female	Han	non-majoring sport	Anqing normal university	162	162	0	0	58.9	60.9	2	-0.0339559	4.15	4.6	0.45	-0.108434	5.51	5.34	-0.17	0.030853	1.18	1.57	0.39	-0.330508	2.7	2.38	-0.32	0.118519	1.25	1.72	0.47	-0.376
H40	male	Han	non-majoring sport	Anqing normal university	181	181	0	0	70.2	70	-0.2	0.002849	4.23	4.61	0.38	-0.0898345	0.78	5.61	4.83	-6.19231	1.24	1.79	0.55	-0.443548	2.63	2.3	-0.33	0.125475	1.54	1.29	-0.25	0.162338
H41	female	Han	non-majoring sport	Anqing normal university	168	168	0	0	53.9	51.2	-2.7	0.0500928	5.22	4.82	-0.4	0.0766284	5.01	5.25	0.24	-0.0479042	1.9	1.89	-0.01	0.00526316	3.03	2.42	-0.61	0.20132	0.83	0.86	0.03	-0.0361446
H42	male	Han	non-majoring sport	Anqing normal university	172	172	0	0	73.3	73.7	0.4	-0.00545703	5.22	4.64	-0.58	0.111111	5.54	5.6	0.06	-0.0108303	1.51	1.32	-0.19	0.125828	3.09	2.71	-0.38	0.122977	1.68	1.84	0.16	-0.0952381
H43	male	Han	non-majoring sport	Anqing normal university	183	183	0	0	74.6	72.7	-1.9	0.0254692	4.6	4.51	-0.09	0.0195652	5.33	5.2	-0.13	0.0243902	1.1	1.64	0.54	-0.490909	2.91	2.3	-0.61	0.209622	1.61	1.39	-0.22	0.136646
H44	female	Han	non-majoring sport	Anqing normal university	161	161	0	0	42.3	43.8	1.5	-0.035461	3.7	3.02	-0.68	0.183784	5.21	5.81	0.6	-0.115163	1.32	1.24	-0.08	0.0606061	2.35	1.51	-0.84	0.357447	0.9	0.73	-0.17	0.188889
H45	male	Han	non-majoring sport	Anqing normal university	177	177	0	0	72.1	64.8	-7.3	0.101248	4.57	4.08	-0.49	0.107221	5.82	5.64	-0.18	0.0309278	1.26	1.38	0.12	-0.0952381	3.14	2.48	-0.66	0.210191	1.29	0.85	-0.44	0.341085
H46	female	Han	non-majoring sport	Anqing normal university	158	158	0	0	49.4	47	-2.4	0.048583	4.47	4.61	0.14	-0.0313199	5.49	5.24	-0.25	0.0455373	1.58	1.81	0.23	-0.14557	2.51	2.29	-0.22	0.0876494	1.09	1	-0.09	0.0825688
H47	male	Han	non-majoring sport	Anqing normal university	170	170	0	0	58.3	60.6	2.3	-0.0394511	2.89	2.99	0.1	-0.0346021	5.44	5.16	-0.28	0.0514706	1.27	1.27	0	0	1.64	1.49	-0.15	0.0914634	0.99	1.02	0.03	-0.030303
H48	female	Han	non-majoring sport	Anqing normal university	168	168	0	0	56.9	54.9	-2	0.0351494	4.16	4.25	0.09	-0.0216346	5.92	5.83	-0.09	0.0152027	1.41	1.88	0.47	-0.333333	2.59	2	-0.59	0.227799	1.29	0.96	-0.33	0.255814
H49	male	Han	non-majoring sport	Anqing normal university	180	180	0	0	80.3	72.5	-7.8	0.0971357	3.05	3.45	0.4	-0.131148	5.61	5.67	0.06	-0.0106952	1.17	1.47	0.3	-0.25641	1.96	1.71	-0.25	0.127551	1.17	1.04	-0.13	0.111111
H50	female	Han	non-majoring sport	Anqing normal university	150	150	0	0	52.6	53.3	0.7	-0.013308	3.8	4.5	0.7	-0.184211	5.97	5.72	-0.25	0.041876	0.99	1.31	0.32	-0.323232	2.58	2.39	-0.19	0.0736434	1.07	1.89	0.82	-0.766355
H51	female	Han	non-majoring sport	Anqing normal university	160	160	0	0	42.3	44.5	2.2	-0.0520095	3.26	2.97	-0.29	0.0889571	4.88	4.7	-0.18	0.0368852	1.5	1.45	-0.05	0.0333333	1.75	1.34	-0.41	0.234286	0.78	0.66	-0.12	0.153846
H52	female	Han	non-majoring sport	Anqing normal university	163	163	0	0	52	52.1	0.1	-0.00192308	4.78	5.74	0.96	-0.200837	5.69	5.41	-0.28	0.0492091	1.39	1.93	0.54	-0.388489	2.68	2.9	0.22	-0.0820896	2.23	2.04	-0.19	0.0852018
H53	female	Han	non-majoring sport	Anqing normal university	155	155	0	0	44.9	45.9	1	-0.0222717	4.39	4.36	-0.03	0.00683371	5.36	5.83	0.47	-0.0876866	1.31	1.68	0.37	-0.282443	2.72	2.23	-0.49	0.180147	1.57	1.04	-0.53	0.33758
H54	female	Han	non-majoring sport	Anqing normal university	175	175	0	0	66.7	68.5	1.8	-0.0269865	4.23	5.68	1.45	-0.34279	5.83	5.54	-0.29	0.0497427	1.41	1.96	0.55	-0.390071	2.47	2.95	0.48	-0.194332	1.58	2.44	0.86	-0.544304
H55	female	Han	non-majoring sport	Anqing normal university	158	158	0	0	59.6	61.3	1.7	-0.0285235	3.45	4.07	0.62	-0.17971	5.34	5.29	-0.05	0.0093633	1.46	1.76	0.3	-0.205479	1.96	1.99	0.03	-0.0153061	0.71	0.8	0.09	-0.126761
H56	female	Han	non-majoring sport	Anqing normal university	158	158	0	0	54.1	53.2	-0.9	0.0166359	4.24	4.3	0.06	-0.0141509	5.11	5.32	0.21	-0.0410959	1.76	1.62	-0.14	0.0795455	2.33	2.16	-0.17	0.0729614	1.1	0.9	-0.2	0.181818
H57	female	Han	non-majoring sport	Anqing normal university	165	165	0	0	58.6	56.2	-2.4	0.0409556	3.75	4.49	0.74	-0.197333	5.28	5.08	-0.2	0.0378788	1.47	1.63	0.16	-0.108844	2.11	2.27	0.16	-0.0758294	0.99	1.05	0.06	-0.0606061
H58	female	Han	non-majoring sport	Anqing normal university	160	160	0	0	46.3	48.5	2.2	-0.0475162	3.67	4	0.33	-0.0899183	4.9	5.05	0.15	-0.0306122	1.91	1.78	-0.13	0.0680628	1.96	1.94	-0.02	0.0102041	0.89	0.89	0	0
H59	male	Han	non-majoring sport	Anqing normal university	184	184	0	0	85.3	87.2	1.9	-0.0222743	4.24	4.11	-0.13	0.0306604	5.34	5.09	-0.25	0.0468165	1.19	1.14	-0.05	0.0420168	2.39	1.97	-0.42	0.175732	2.54	1.94	-0.6	0.23622
H60	female	Han	non-majoring sport	Anqing normal university	154	154	0	0	48.1	46.9	-1.2	0.024948	4.38	4.37	-0.01	0.00228311	5.77	5.39	-0.38	0.0658579	1.24	1.55	0.31	-0.25	2.78	2.31	-0.47	0.169065	1.39	0.9	-0.49	0.352518
H61	female	Han	non-majoring sport	Anqing normal university	158	158	0	0	58.1	54.6	-3.5	0.060241	5.02	4.86	-0.16	0.0318725	5.35	5.28	-0.07	0.0130841	1.35	1.56	0.21	-0.155556	3.18	2.67	-0.51	0.160377	1.08	0.94	-0.14	0.12963
H62	male	Han	non-majoring sport	Anqing normal university	182	182	0	0	84.1	84.8	0.7	-0.00832342	4.45	4.62	0.17	-0.0382022	5.47	5.94	0.47	-0.0859232	1.57	1.44	-0.13	0.0828025	2.69	2.61	-0.08	0.0297398	1.46	1.56	0.1	-0.0684932
H63	female	Han	non-majoring sport	Anqing normal university	158	162	4	-0.0253165	53.2	54.2	1	-0.018797	4.2	4.64	0.44	-0.104762	5.62	5.35	-0.27	0.0480427	1.55	1.52	-0.03	0.0193548	2.31	2.34	0.03	-0.012987	1.41	1.45	0.04	-0.0283688
H64	female	Han	non-majoring sport	Anqing normal university	162	162	0	0	50	51.6	1.6	-0.032	3.47	3.37	-0.1	0.0288184	5.19	5.22	0.03	-0.00578035	1.7	1.48	-0.22	0.129412	1.86	1.58	-0.28	0.150538	0.99	1.06	0.07	-0.0707071
H65	female	Han	non-majoring sport	Anqing normal university	166	166	0	0	53.8	53.6	-0.2	0.00371747	2.98	2.96	-0.02	0.00671141	5.18	5.09	-0.09	0.0173745	1.06	1.15	0.09	-0.0849057	1.8	1.56	-0.24	0.133333	1.59	1.48	-0.11	0.0691824
H66	female	Han	non-majoring sport	jiangxi normal university	153	153	0	0	52.9	50	-2.9	0.0548204	4.1	4.14	0.04	-0.0097561	5.06	5.11	0.05	-0.00988142	1.71	1.91	0.2	-0.116959	2.81	2.03	-0.78	0.27758	0.69	0.85	0.16	-0.231884
H67	female	Han	non-majoring sport	jiangxi normal university	148	148	0	0	38.6	37.9	-0.7	0.0181347	4.78	3.9	-0.88	0.1841	5.47	5.5	0.03	-0.00548446	1.74	1.75	0.01	-0.00574713	2.86	1.85	-1.01	0.353147	1.17	1.35	0.18	-0.153846
H68	female	Han	non-majoring sport	jiangxi normal university	147.5	147.5	0	0	40.2	39.7	-0.5	0.0124378	3.27	3.49	0.22	-0.0672783	5.58	5.32	-0.26	0.046595	1.29	1.62	0.33	-0.255814	2.23	1.74	-0.49	0.219731	1.38	1.19	-0.19	0.137681
H69	female	Han	non-majoring sport	jiangxi normal university	161.5	161.5	0	0	65	63.9	-1.1	0.0169231	4.98	6.23	1.25	-0.251004	5.32	5.57	0.25	-0.0469925	1.96	2.7	0.74	-0.377551	2.89	3.13	0.24	-0.083045	1.09	0.85	-0.24	0.220183
H70	female	Han	non-majoring sport	jiangxi normal university	158.6	158.6	0	0	54	49	-5	0.0925926	3.93	4.18	0.25	-0.0636132	5.86	5.41	-0.45	0.0767918	1.36	1.89	0.53	-0.389706	2.43	2.09	-0.34	0.139918	1.1	0.73	-0.37	0.336364
H72	female	Han	non-majoring sport	jiangxi normal university	161.7	161.7	0	0	57.1	56.3	-0.8	0.0140105	4.35	5.02	0.67	-0.154023	6.04	5.46	-0.58	0.0960265	1.69	2.05	0.36	-0.213018	2.57	2.51	-0.06	0.0233463	1.61	1.21	-0.4	0.248447
H73	female	Han	non-majoring sport	jiangxi normal university	151.4	151.4	0	0	48.2	47.8	-0.4	0.00829876	3.23	3.84	0.61	-0.188854	5.21	5.86	0.65	-0.12476	1.4	2.08	0.68	-0.485714	1.92	1.72	-0.2	0.104167	0.89	0.62	-0.27	0.303371
H74	female	Han	non-majoring sport	jiangxi normal university	156.3	73	-83.3	0.532949	43.5	42.5	-1	0.0229885	4.18	4.28	0.1	-0.0239234	5.85	5.54	-0.31	0.0529915	2	2.42	0.42	-0.21	2.48	1.91	-0.57	0.229839	0.77	0.67	-0.1	0.12987
H75	female	Han	non-majoring sport	jiangxi normal university	150.3	150.3	0	0	44.9	44.3	-0.6	0.013363	3.38	3.22	-0.16	0.0473373	5.63	5.52	-0.11	0.0195382	1.88	1.9	0.02	-0.0106383	1.93	1.38	-0.55	0.284974	1.21	1.07	-0.14	0.115702
H76	female	Han	non-majoring sport	jiangxi normal university	160.2	160.2	0	0	44.1	45.8	1.7	-0.0385488	3.48	3.98	0.5	-0.143678	5.64	5.67	0.03	-0.00531915	1.55	2.04	0.49	-0.316129	2.05	1.81	-0.24	0.117073	1.05	0.91	-0.14	0.133333
H77	female	Han	non-majoring sport	jiangxi normal university	158.2	158.2	0	0	47.3	48.2	0.9	-0.0190275	4.14	4.95	0.81	-0.195652	4.99	5.26	0.27	-0.0541082	1.85	2.51	0.66	-0.356757	2.49	2.35	-0.14	0.0562249	0.98	1.1	0.12	-0.122449
H78	female	Han	non-majoring sport	jiangxi normal university	160.1	160.1	0	0	56.1	57.6	1.5	-0.026738	4.54	4.73	0.19	-0.0418502	5.51	5.18	-0.33	0.0598911	1.48	2.05	0.57	-0.385135	3.18	2.55	-0.63	0.198113	1.06	1.53	0.47	-0.443396
H79	female	Han	non-majoring sport	jiangxi normal university	159.5	159.5	0	0	50.4	50.4	0	0	3.91	3.57	-0.34	0.0869565	5.39	5.5	0.11	-0.0204082	2.33	2.41	0.08	-0.0343348	2.13	1.4	-0.73	0.342723	0.95	0.76	-0.19	0.2
H80	female	Han	non-majoring sport	jiangxi normal university	165.3	165.3	0	0	48	51.2	3.2	-0.0666667	3.97	3.73	-0.24	0.0604534	5.15	4.98	-0.17	0.0330097	1.73	2.08	0.35	-0.202312	2.35	1.66	-0.69	0.293617	1.2	0.83	-0.37	0.308333
H81	female	Han	non-majoring sport	jiangxi normal university	169.3	169.3	0	0	53.2	54.6	1.4	-0.0263158	2.94	2.79	-0.15	0.0510204	5.1	5.48	0.38	-0.0745098	1.74	1.64	-0.1	0.0574713	1.65	1.24	-0.41	0.248485	0.81	0.45	-0.36	0.444444
H82	female	Han	non-majoring sport	jiangxi normal university	157.3	157.3	0	0	53	52.9	-0.1	0.00188679	4.51	4.77	0.26	-0.0576497	5.49	5.57	0.08	-0.0145719	1.72	2.19	0.47	-0.273256	2.75	2.25	-0.5	0.181818	1.02	1.09	0.07	-0.0686275
H83	female	Han	non-majoring sport	jiangxi normal university	157.8	157.8	0	0	52.8	48.1	-4.7	0.0890152	3.45	4.82	1.37	-0.397101	5.24	5.16	-0.08	0.0152672	2.06	2.91	0.85	-0.412621	2.01	2.09	0.08	-0.039801	1.13	0.69	-0.44	0.389381
H84	female	Han	non-majoring sport	jiangxi normal university	160	160	0	0	50.6	48.6	-2	0.0395257	4.74	3.91	-0.83	0.175105	5.06	5.36	0.3	-0.0592885	1.44	1.8	0.36	-0.25	4.15	1.95	-2.2	0.53012	1.14	1.03	-0.11	0.0964912
H85	female	Han	non-majoring sport	jiangxi normal university	164.3	164.3	0	0	50.8	51.9	1.1	-0.0216535	4.06	4.48	0.42	-0.103448	4.93	5.55	0.62	-0.125761	1.74	2.18	0.44	-0.252874	2.29	2.07	-0.22	0.0960699	1.06	1.01	-0.05	0.0471698
H86	female	Han	non-majoring sport	jiangxi normal university	153.5	153.5	0	0	50.8	51.7	0.9	-0.0177165	4.28	4.85	0.57	-0.133178	5.27	6.04	0.77	-0.14611	1.65	2.22	0.57	-0.345455	2.65	2.33	-0.32	0.120755	1.05	0.96	-0.09	0.0857143
H87	female	Han	non-majoring sport	jiangxi normal university	158.2	158.2	0	0	49.4	50.9	1.5	-0.0303644	4.38	4.84	0.46	-0.105023	5.11	5.57	0.46	-0.0900196	1.08	1.91	0.83	-0.768519	3.12	2.6	-0.52	0.166667	1.04	1.43	0.39	-0.375
H88	female	Han	non-majoring sport	jiangxi normal university	159.5	159.5	0	0	52.4	51.2	-1.2	0.0229008	5.59	4.71	-0.88	0.157424	5.18	5.46	0.28	-0.0540541	1.31	1.84	0.53	-0.40458	3.58	2.41	-1.17	0.326816	1.4	1.91	0.51	-0.364286
H89	female	Han	non-majoring sport	jiangxi normal university	160.4	160.4	0	0	47.7	49.3	1.6	-0.033543	4.4	3.98	-0.42	0.0954545	5.1	5.13	0.03	-0.00588235	1.61	1.97	0.36	-0.223602	2.63	1.88	-0.75	0.285171	1.19	0.99	-0.2	0.168067
H90	female	Han	non-majoring sport	jiangxi normal university	159.8	159.8	0	0	41.9	43.2	1.3	-0.0310263	4.44	3.94	-0.5	0.112613	5.8	5.42	-0.38	0.0655172	1.38	1.69	0.31	-0.224638	2.87	1.99	-0.88	0.30662	1.31	0.94	-0.37	0.282443
H91	female	Han	non-majoring sport	jiangxi normal university	160.5	160.5	0	0	49.2	50.5	1.3	-0.0264228	3.68	4.24	0.56	-0.152174	5.55	5.39	-0.16	0.0288288	2.2	2.56	0.36	-0.163636	1.91	1.72	-0.19	0.0994764	1.26	0.93	-0.33	0.261905
H92	female	Han	non-majoring sport	jiangxi normal university	154.5	154.5	0	0	51.4	51.3	-0.1	0.00194553	4.45	3.93	-0.52	0.116854	5.38	5.53	0.15	-0.027881	1.84	1.96	0.12	-0.0652174	2.64	1.85	-0.79	0.299242	1.09	0.76	-0.33	0.302752
H94	female	Han	non-majoring sport	jiangxi normal university	168	168	0	0	50.3	49.7	-0.6	0.0119284	4.37	4.24	-0.13	0.0297483	4.9	5.08	0.18	-0.0367347	1.97	2.19	0.22	-0.111675	2.49	1.85	-0.64	0.257028	1.53	1	-0.53	0.346405
H95	female	Han	non-majoring sport	jiangxi normal university	154.3	154.3	0	0	49.1	49.6	0.5	-0.0101833	4.15	4.02	-0.13	0.0313253	5.37	5.87	0.5	-0.0931099	2.1	2.24	0.14	-0.0666667	2.45	1.69	-0.76	0.310204	1.05	0.65	-0.4	0.380952
H96	female	Han	non-majoring sport	jiangxi normal university	161	161	0	0	47.4	46.3	-1.1	0.0232068	4.55	4.49	-0.06	0.0131868	5.63	5.76	0.13	-0.0230906	1.44	2.05	0.61	-0.423611	2.78	2.14	-0.64	0.230216	1.62	1.27	-0.35	0.216049
H97	female	Han	non-majoring sport	jiangxi normal university	154.6	154.6	0	0	63.6	64.2	0.6	-0.00943396	4.55	4.4	-0.15	0.032967	5.38	5.28	-0.1	0.0185874	1.36	1.81	0.45	-0.330882	2.88	2.36	-0.52	0.180556	1.16	0.89	-0.27	0.232759
H98	female	Han	non-majoring sport	jiangxi normal university	158	158	0	0	55	53	-2	0.0363636	3.12	3.5	0.38	-0.121795	4.96	5.32	0.36	-0.0725806	1.74	2.15	0.41	-0.235632	1.86	1.5	-0.36	0.193548	0.89	0.71	-0.18	0.202247
H99	female	Han	non-majoring sport	jiangxi normal university	162	162	0	0	44.4	45.7	1.3	-0.0292793	5.67	5.38	-0.29	0.0511464	5.06	5.97	0.91	-0.179842	2.85	3.12	0.27	-0.0947368	3.25	2.4	-0.85	0.261538	1.06	1.18	0.12	-0.113208
H100	female	Han	non-majoring sport	jiangxi normal university	160.4	160.4	0	0	57.8	59	1.2	-0.0207612	3.98	5.09	1.11	-0.278894	5.15	5.74	0.59	-0.114563	0.98	1.68	0.7	-0.714286	2.63	2.8	0.17	-0.0646388	0.89	2.02	1.13	-1.26966
H101	male	Han	non-majoring sport	jiangxi normal university	173.5	173.5	0	0	77.8	76.7	-1.1	0.0141388	5.2	5.01	-0.19	0.0365385	5.13	5.63	0.5	-0.0974659	1.4	2.02	0.62	-0.442857	3.64	2.65	-0.99	0.271978	0.91	0.98	0.07	-0.0769231
H103	male	Han	non-majoring sport	jiangxi normal university	171.2	171.2	0	0	59	58.7	-0.3	0.00508475	3.86	3.6	-0.26	0.0673575	5.45	5.43	-0.02	0.00366972	1.04	1.49	0.45	-0.432692	2.45	1.88	-0.57	0.232653	2.07	1.72	-0.35	0.169082
H104	male	Han	non-majoring sport	jiangxi normal university	169.5	169.5	0	0	66.3	65	-1.3	0.0196078	3.77	3.71	-0.06	0.0159151	5.76	5.49	-0.27	0.046875	1.11	1.56	0.45	-0.405405	2.58	1.93	-0.65	0.251938	1.4	1.07	-0.33	0.235714
H105	male	Han	non-majoring sport	jiangxi normal university	166	166	0	0	62.9	60.8	-2.1	0.0333863	2.6	2.98	0.38	-0.146154	5.32	5.04	-0.28	0.0526316	1.55	1.44	-0.11	0.0709677	1.56	1.22	-0.34	0.217949	0.97	1.15	0.18	-0.185567
H106	male	Han	non-majoring sport	jiangxi normal university	170.4	170.4	0	0	57.3	56.8	-0.5	0.008726	3.53	3.29	-0.24	0.0679887	5.28	5.35	0.07	-0.0132576	1.22	1.5	0.28	-0.229508	2.31	1.65	-0.66	0.285714	0.83	0.72	-0.11	0.13253
H107	male	Han	non-majoring sport	jiangxi normal university	172.3	172.3	0	0	65.1	60.4	-4.7	0.0721966	4.17	4.03	-0.14	0.0335731	4.54	5.5	0.96	-0.211454	1.18	1.56	0.38	-0.322034	2.83	2.14	-0.69	0.243816	1.04	1	-0.04	0.0384615
H108	male	Han	non-majoring sport	jiangxi normal university	170.4	170.4	0	0	64.4	64.7	0.3	-0.00465839	3.29	3.12	-0.17	0.0516717	5.36	5.37	0.01	-0.00186567	1.36	1.43	0.07	-0.0514706	1.95	1.54	-0.41	0.210256	1.01	0.86	-0.15	0.148515
H109	male	Han	non-majoring sport	jiangxi normal university	166.5	166.5	0	0	55.3	58	2.7	-0.0488246	3.44	3.4	-0.04	0.0116279	5.25	5.18	-0.07	0.0133333	1.48	1.74	0.26	-0.175676	2.1	1.6	-0.5	0.238095	1.16	0.91	-0.25	0.215517
H110	male	Han	non-majoring sport	jiangxi normal university	173.5	173.5	0	0	58.1	56.1	-2	0.0344234	3.44	3.63	0.19	-0.0552326	5.35	5.34	-0.01	0.00186916	1.76	2.04	0.28	-0.159091	1.99	1.62	-0.37	0.18593	1.12	0.9	-0.22	0.196429
H111	male	Han	non-majoring sport	jiangxi normal university	167.4	167.4	0	0	54.9	58.4	3.5	-0.0637523	3.95	3.58	-0.37	0.0936709	5.28	5.35	0.07	-0.0132576	1.5	1.64	0.14	-0.0933333	2.37	1.68	-0.69	0.291139	1.35	1	-0.35	0.259259
H112	male	Han	non-majoring sport	jiangxi normal university	178.2	178.2	0	0	65.1	65.1	0	0	4.62	3.83	-0.79	0.170996	5.52	5.52	0	0	1.39	1.66	0.27	-0.194245	2.81	1.97	-0.84	0.298932	1.68	1.42	-0.26	0.154762
H113	male	Han	non-majoring sport	jiangxi normal university	173.3	173.3	0	0	60.6	56.7	-3.9	0.0643564	5.18	5.17	-0.01	0.0019305	5.68	5.25	-0.43	0.0757042	1.99	2.45	0.46	-0.231156	3.11	2.47	-0.64	0.205788	0.88	0.65	-0.23	0.261364
H114	male	Han	non-majoring sport	jiangxi normal university	163.8	163.8	0	0	61	59.1	-1.9	0.0311475	4.36	4.4	0.04	-0.00917431	5.24	5.21	-0.03	0.00572519	2.05	2.09	0.04	-0.0195122	2.57	2.15	-0.42	0.163424	1.28	1.81	0.53	-0.414062
H115	male	Han	non-majoring sport	jiangxi normal university	174	174	0	0	90.4	83.4	-7	0.0774336	4.27	2.76	-1.51	0.35363	5.69	5.69	0	0	1.26	1.3	0.04	-0.031746	2.84	1.28	-1.56	0.549296	1.27	0.76	-0.51	0.401575
H117	male	Han	non-majoring sport	jiangxi normal university	173	173	0	0	65	62.8	-2.2	0.0338462	3.65	3.11	-0.54	0.147945	6.48	5.67	-0.81	0.125	1.88	1.82	-0.06	0.0319149	2.15	1.42	-0.73	0.339535	1.26	0.68	-0.58	0.460317
H118	male	Han	non-majoring sport	jiangxi normal university	173.5	173.5	0	0	69.3	65.5	-3.8	0.0548341	3.5	2.88	-0.62	0.177143	5.55	5.85	0.3	-0.0540541	1.69	1.46	-0.23	0.136095	2.09	1.49	-0.6	0.287081	0.72	0.67	-0.05	0.0694444
H120	male	Han	non-majoring sport	jiangxi normal university	168	168	0	0	65.3	62.5	-2.8	0.042879	3.47	3.69	0.22	-0.0634006	5.23	5.35	0.12	-0.0229446	2.01	2.32	0.31	-0.154229	1.96	1.68	-0.28	0.142857	1.02	0.8	-0.22	0.215686
H121	male	Han	non-majoring sport	jiangxi normal university	166.7	166.7	0	0	65.6	63.6	-2	0.0304878	4.37	4.21	-0.16	0.0366133	5.14	5.28	0.14	-0.0272374	0.88	1.47	0.59	-0.670455	2.87	2.24	-0.63	0.219512	2.4	1.47	-0.93	0.3875
H122	male	Han	non-majoring sport	jiangxi normal university	172.9	172.9	0	0	78.8	75.7	-3.1	0.0393401	3.96	3.49	-0.47	0.118687	5.52	5.12	-0.4	0.0724638	1.65	1.84	0.19	-0.115152	2.57	1.65	-0.92	0.357977	1.13	0.84	-0.29	0.256637
H123	male	Han	non-majoring sport	jiangxi normal university	172.4	172.4	0	0	73.4	70.4	-3	0.0408719	4.29	4.9	0.61	-0.142191	5.64	5.71	0.07	-0.0124113	0.96	1.6	0.64	-0.666667	2.82	2.77	-0.05	0.0177305	1.84	1.24	-0.6	0.326087
H124	male	Han	non-majoring sport	jiangxi normal university	173.4	173.4	0	0	82.4	76.7	-5.7	0.0691748	4.96	4.93	-0.03	0.00604839	6.01	5.5	-0.51	0.0848586	1.26	1.94	0.68	-0.539683	3.32	2.64	-0.68	0.204819	1.05	0.59	-0.46	0.438095
H126	male	Han	non-majoring sport	jiangxi normal university	175.4	175.4	0	0	63.7	61	-2.7	0.0423862	3.49	3.24	-0.25	0.0716332	5.48	4.11	-1.37	0.25	1.37	1.47	0.1	-0.0729927	2.2	1.56	-0.64	0.290909	1.42	1.15	-0.27	0.190141
H127	male	Han	non-majoring sport	jiangxi normal university	171.6	171.6	0	0	53.4	55.4	2	-0.0374532	3.17	3.39	0.22	-0.0694006	5.04	5.28	0.24	-0.047619	1.23	1.45	0.22	-0.178862	2.07	1.73	-0.34	0.164251	0.86	1.22	0.36	-0.418605
H128	male	Han	non-majoring sport	jiangxi normal university	167.5	167.5	0	0	50.6	49.2	-1.4	0.027668	4.09	4.24	0.15	-0.0366748	5.98	5.96	-0.02	0.00334448	1.77	2.05	0.28	-0.158192	2.53	1.98	-0.55	0.217391	1.22	0.93	-0.29	0.237705
H129	male	Han	non-majoring sport	jiangxi normal university	159.3	159.3	0	0	46.7	51	4.3	-0.0920771	3.17	3.36	0.19	-0.0599369	4.8	5.02	0.22	-0.0458333	1.39	1.63	0.24	-0.172662	2.02	1.72	-0.3	0.148515	0.87	0.77	-0.1	0.114943
H130	male	Han	non-majoring sport	jiangxi normal university	167.4	167.4	0	0	55.7	56.3	0.6	-0.010772	3.71	3.49	-0.22	0.0592992	5.57	5.34	-0.23	0.0412926	1.12	1.53	0.41	-0.366071	2.47	1.84	-0.63	0.255061	1.41	1.12	-0.29	0.205674
H131	male	Han	non-majoring sport	jiangxi normal university	168.7	168.7	0	0	80	77.5	-2.5	0.03125	3.66	3.92	0.26	-0.0710383	3.36	6.28	2.92	-0.869048	1.21	1.75	0.54	-0.446281	2.76	2.05	-0.71	0.257246	0.82	1.06	0.24	-0.292683
H132	male	Han	non-majoring sport	jiangxi normal university	172.5	172.5	0	0	54.2	55.1	0.9	-0.0166052	4.47	4.48	0.01	-0.00223714	5.25	5.43	0.18	-0.0342857	2.1	2.47	0.37	-0.17619	2.49	2.04	-0.45	0.180723	1.26	0.78	-0.48	0.380952
H133	male	Han	non-majoring sport	jiangxi normal university	172.6	172.6	0	0	59.4	60.8	1.4	-0.023569	4.02	4.42	0.4	-0.0995025	5.19	5.65	0.46	-0.088632	1.78	2.1	0.32	-0.179775	2.43	2.21	-0.22	0.090535	0.76	0.9	0.14	-0.184211
H135	male	Han	non-majoring sport	jiangxi normal university	182.5	182.5	0	0	68.9	67.4	-1.5	0.0217707	3.37	2.99	-0.38	0.11276	5.12	5.61	0.49	-0.0957031	1.63	1.64	0.01	-0.00613497	2.05	1.32	-0.73	0.356098	0.83	0.77	-0.06	0.0722892
H137	male	Han	non-majoring sport	jiangxi normal university	172.2	172.2	0	0	62.7	64	1.3	-0.0207337	3.73	3.69	-0.04	0.0107239	5.52	5.37	-0.15	0.0271739	2.24	2.18	-0.06	0.0267857	2.08	1.57	-0.51	0.245192	1.13	1.22	0.09	-0.079646
H138	male	Han	non-majoring sport	jiangxi normal university	167.4	167.4	0	0	61.2	60.7	-0.5	0.00816993	3.74	3.74	0	0	5.12	5.43	0.31	-0.0605469	1.63	2.17	0.54	-0.331288	2.42	1.76	-0.66	0.272727	0.92	0.53	-0.39	0.423913
H139	male	Han	non-majoring sport	Inner Mongolia Normal University	177	177	0	0	78.7	73.4	-5.3	0.0673443	3.31	3.25	-0.06	0.0181269	5.14	5.78	0.64	-0.124514	1.51	1.68	0.17	-0.112583	1.93	1.64	-0.29	0.150259	1.05	1.12	0.07	-0.0666667
H140	male	Han	non-majoring sport	Inner Mongolia Normal University	176.1	176.1	0	0	72.9	74.8	1.9	-0.0260631	4.36	5.27	0.91	-0.208716	4.75	5.3	0.55	-0.115789	2.23	2.27	0.04	-0.0179372	2.5	2.89	0.39	-0.156	1.08	1.19	0.11	-0.101852
H141	male	Han	non-majoring sport	Inner Mongolia Normal University	171	171	0	0	60.8	57.1	-3.7	0.0608553	3.95	4.2	0.25	-0.0632911	5.41	5.89	0.48	-0.0887246	1.94	2.21	0.27	-0.139175	2.24	2.24	0	0	0.85	0.96	0.11	-0.129412
H142	male	Han	non-majoring sport	Inner Mongolia Normal University	173.4	173.4	0	0	67.2	65.5	-1.7	0.0252976	3.63	3.97	0.34	-0.0936639	5.15	5.71	0.56	-0.108738	1.68	1.69	0.01	-0.00595238	2.05	2.22	0.17	-0.0829268	0.93	1.17	0.24	-0.258065
H143	male	Han	non-majoring sport	Inner Mongolia Normal University	171.3	171.3	0	0	59.8	61.5	1.7	-0.0284281	3.08	3.64	0.56	-0.181818	5.23	5.63	0.4	-0.0764818	1.31	1.32	0.01	-0.00763359	1.96	2.34	0.38	-0.193878	0.77	0.9	0.13	-0.168831
H144	male	Han	non-majoring sport	Inner Mongolia Normal University	185.3	189.3	4	-0.0215866	103.5	109.3	5.8	-0.0560386	3.75	5.22	1.47	-0.392	5.65	6.04	0.39	-0.0690265	0.93	1	0.07	-0.0752688	2.53	3.54	1.01	-0.399209	2.05	1.88	-0.17	0.0829268
H145	male	Han	non-majoring sport	Inner Mongolia Normal University	178	178.5	0.5	-0.00280899	62.8	45.6	-17.2	0.273885	2.94	3.1	0.16	-0.0544218	5.23	5.62	0.39	-0.0745698	1.67	1.58	-0.09	0.0538922	1.64	1.74	0.1	-0.0609756	1.15	1.05	-0.1	0.0869565
H146	male	Han	non-majoring sport	Inner Mongolia Normal University	176.5	176.6	0.1	-0.000566572	78	79.6	1.6	-0.0205128	4.26	3.97	-0.29	0.0680751	4.82	5.22	0.4	-0.0829876	1.29	1.3	0.01	-0.00775194	2.76	2.26	-0.5	0.181159	1.47	1.37	-0.1	0.0680272
H147	male	Han	non-majoring sport	Inner Mongolia Normal University	172	172	0	0	95.2	87.9	-7.3	0.0766807	2.94	3.33	0.39	-0.132653	5.6	5.81	0.21	-0.0375	0.83	0.79	-0.04	0.0481928	1.84	1.89	0.05	-0.0271739	3.73	2.96	-0.77	0.206434
H148	male	Han	non-majoring sport	Inner Mongolia Normal University	175	175	0	0	73.1	72.5	-0.6	0.00820793	4	4.02	0.02	-0.005	5.29	6.04	0.75	-0.141777	2.17	2.45	0.28	-0.129032	2.26	2.01	-0.25	0.110619	0.8	0.7	-0.1	0.125
H149	male	Han	non-majoring sport	Inner Mongolia Normal University	165.5	165.5	0	0	57.4	60.1	2.7	-0.0470383	3.74	3.34	-0.4	0.106952	5.02	5.52	0.5	-0.0996016	1.83	1.51	-0.32	0.174863	2.08	1.98	-0.1	0.0480769	1.1	1.29	0.19	-0.172727
H150	male	Han	non-majoring sport	Inner Mongolia Normal University	171.5	171.5	0	0	52.8	53.2	0.4	-0.00757576	3.23	3.25	0.02	-0.00619195	4.98	5.51	0.53	-0.106426	1.55	1.67	0.12	-0.0774194	1.91	1.77	-0.14	0.0732984	0.88	0.99	0.11	-0.125
H151	male	Han	non-majoring sport	Inner Mongolia Normal University	175	175	0	0	65.3	62.7	-2.6	0.0398162	3.88	4.37	0.49	-0.126289	4.98	5.6	0.62	-0.124498	1.26	1.32	0.06	-0.047619	2.46	2.68	0.22	-0.0894309	1.67	1.57	-0.1	0.0598802
H152	male	Han	non-majoring sport	Inner Mongolia Normal University	179	179	0	0	59.1	54.3	-4.8	0.0812183	3.91	4.62	0.71	-0.181586	4.81	5.66	0.85	-0.176715	2.22	2.17	-0.05	0.0225225	2.1	2.45	0.35	-0.166667	0.85	1.09	0.24	-0.282353
H153	male	Han	non-majoring sport	Inner Mongolia Normal University	176.2	176.2	0	0	65.1	63.8	-1.3	0.0199693	3.47	3.38	-0.09	0.0259366	5.54	6.11	0.57	-0.102888	1.57	1.53	-0.04	0.0254777	2.13	1.87	-0.26	0.122066	0.91	1.06	0.15	-0.164835
H154	male	Han	non-majoring sport	Inner Mongolia Normal University	179	179	0	0	88.9	84.1	-4.8	0.0539933	2.73	2.9	0.17	-0.0622711	4.55	5.41	0.86	-0.189011	1.15	1.6	0.45	-0.391304	1.64	1.49	-0.15	0.0914634	1.09	0.91	-0.18	0.165138
H155	male	Han	non-majoring sport	Inner Mongolia Normal University	175.5	175.7	0.2	-0.0011396	47.5	48.3	0.8	-0.0168421	4.4	5.99	1.59	-0.361364	4.8	5.34	0.54	-0.1125	2.29	2.67	0.38	-0.165939	2.47	3.22	0.75	-0.303644	1.21	1.39	0.18	-0.14876
H157	male	Han	non-majoring sport	Inner Mongolia Normal University	176.2	176.4	0.2	-0.00113507	71	68.2	-2.8	0.0394366	3.85	3.78	-0.07	0.0181818	5.21	5.9	0.69	-0.132438	1.44	1.7	0.26	-0.180556	2.35	2.15	-0.2	0.0851064	0.87	0.95	0.08	-0.091954
H158	male	Han	non-majoring sport	Inner Mongolia Normal University	178	178	0	0	102.2	93.1	-9.1	0.0890411	3.8	4.57	0.77	-0.202632	5.02	5.66	0.64	-0.12749	0.48	0.73	0.25	-0.520833	2.63	2.8	0.17	-0.0646388	2.85	1.86	-0.99	0.347368
H159	male	Han	non-majoring sport	Inner Mongolia Normal University	183.4	183.4	0	0	69	68.8	-0.2	0.00289855	2.77	2.27	-0.5	0.180505	4.65	5.3	0.65	-0.139785	1.32	1.36	0.04	-0.030303	1.62	1.08	-0.54	0.333333	1.32	1.43	0.11	-0.0833333
H160	male	Han	non-majoring sport	Inner Mongolia Normal University	180	180	0	0	66.5	64	-2.5	0.037594	3.33	2.99	-0.34	0.102102	5.21	5.84	0.63	-0.120921	1.44	1.76	0.32	-0.222222	2.02	1.62	-0.4	0.19802	0.97	0.76	-0.21	0.216495
H161	male	Han	non-majoring sport	Inner Mongolia Normal University	179.5	179.5	0	0	76.3	75.6	-0.7	0.00917431	3.92	3.94	0.02	-0.00510204	5.38	5.77	0.39	-0.0724907	1.53	1.41	-0.12	0.0784314	2.44	2.18	-0.26	0.106557	1.23	1.77	0.54	-0.439024
H162	male	Han	non-majoring sport	Inner Mongolia Normal University	168	168	0	0	58.7	55.8	-2.9	0.0494037	4.25	4.38	0.13	-0.0305882	4.87	5.84	0.97	-0.199179	1.82	2.11	0.29	-0.159341	2.39	2.23	-0.16	0.0669456	0.9	1.3	0.4	-0.444444
H163	male	Han	non-majoring sport	Inner Mongolia Normal University	179.4	179.4	0	0	100	97.1	-2.9	0.029	3.3	3.55	0.25	-0.0757576	5.48	5.79	0.31	-0.0565693	1.08	1.02	-0.06	0.0555556	2.23	2.15	-0.08	0.0358744	1.02	1.57	0.55	-0.539216
H164	male	Han	non-majoring sport	Inner Mongolia Normal University	186	186	0	0	87	82.8	-4.2	0.0482759	3.6	3.82	0.22	-0.0611111	5.77	6.2	0.43	-0.0745234	1.18	1.23	0.05	-0.0423729	2.28	2.27	-0.01	0.00438596	1.45	1.44	-0.01	0.00689655
H165	female	Han	non-majoring sport	Inner Mongolia Normal University	163.2	163.2	0	0	50.7	50.5	-0.2	0.00394477	3.83	3.84	0.01	-0.00261097	0.65	5.41	4.76	-7.32308	1.23	1.54	0.31	-0.252033	2.36	2.22	-0.14	0.059322	0.62	1.1	0.48	-0.774194
H166	female	Han	non-majoring sport	Inner Mongolia Normal University	159.7	159.7	0	0	45.9	44.9	-1	0.0217865	3.67	4.27	0.6	-0.163488	4.66	5.28	0.62	-0.133047	1.84	2.17	0.33	-0.179348	1.93	2.13	0.2	-0.103627	0.71	1.2	0.49	-0.690141
H167	female	Han	non-majoring sport	Inner Mongolia Normal University	154.2	154.2	0	0	47.2	45.9	-1.3	0.0275424	3.83	3.98	0.15	-0.0391645	5.08	5.47	0.39	-0.0767717	1.76	1.97	0.21	-0.119318	2.15	2.13	-0.02	0.00930233	0.82	0.97	0.15	-0.182927
H168	female	Han	non-majoring sport	Inner Mongolia Normal University	155.4	155.4	0	0	57.5	58.3	0.8	-0.013913	4.4	4.57	0.17	-0.0386364	5.29	5.31	0.02	-0.00378072	1.42	1.66	0.24	-0.169014	2.54	2.51	-0.03	0.011811	1.34	1.47	0.13	-0.0970149
H169	female	Han	non-majoring sport	Inner Mongolia Normal University	164	164	0	0	62.9	59	-3.9	0.0620032	4.24	3.76	-0.48	0.113208	5.35	5.52	0.17	-0.0317757	2	1.86	-0.14	0.07	2.32	1.98	-0.34	0.146552	0.88	0.88	0	0
H170	female	Han	non-majoring sport	Inner Mongolia Normal University	153.5	153.5	0	0	51.9	54.1	2.2	-0.0423892	4.15	4.07	-0.08	0.0192771	0.66	5.87	5.21	-7.89394	1.74	1.51	-0.23	0.132184	2.28	2.22	-0.06	0.0263158	1.92	2.14	0.22	-0.114583
H171	female	Han	non-majoring sport	Inner Mongolia Normal University	157.2	157.2	0	0	64.7	62.7	-2	0.0309119	4.8	4.44	-0.36	0.075	5.25	5.78	0.53	-0.100952	1.97	1.81	-0.16	0.0812183	2.87	2.46	-0.41	0.142857	1.27	1.74	0.47	-0.370079
H172	female	Han	non-majoring sport	Inner Mongolia Normal University	170.2	169.6	-0.6	0.00352526	61.7	62.2	0.5	-0.00810373	4.15	4.37	0.22	-0.053012	4.9	5.53	0.63	-0.128571	1.79	1.87	0.08	-0.0446927	2.37	2.44	0.07	-0.0295359	1.1	0.97	-0.13	0.118182
H173	female	Han	non-majoring sport	Inner Mongolia Normal University	169	169	0	0	48.7	48.8	0.1	-0.00205339	2.99	3.39	0.4	-0.133779	5.52	4.62	-0.9	0.163043	1.91	2.1	0.19	-0.0994764	1.45	1.61	0.16	-0.110345	0.95	0.69	-0.26	0.273684
H174	female	Han	non-majoring sport	Inner Mongolia Normal University	153.1	153.7	0.6	-0.00391901	54.6	52.4	-2.2	0.040293	3.3	3.97	0.67	-0.20303	5.75	6.09	0.34	-0.0591304	1.78	2.16	0.38	-0.213483	1.69	2.09	0.4	-0.236686	0.94	0.87	-0.07	0.0744681
H175	female	Han	non-majoring sport	Inner Mongolia Normal University	167.6	168.2	0.6	-0.00357995	54.2	56	1.8	-0.0332103	3.9	4.8	0.9	-0.230769	5.22	6.56	1.34	-0.256705	1.94	2.43	0.49	-0.252577	2.04	2.51	0.47	-0.230392	0.77	0.87	0.1	-0.12987
H176	female	Han	non-majoring sport	Inner Mongolia Normal University	176.2	177	0.8	-0.0045403	57.2	59.9	2.7	-0.0472028	3.06	4.44	1.38	-0.45098	0.78	6.12	5.34	-6.84615	1.81	2.19	0.38	-0.209945	1.54	2.25	0.71	-0.461039	0.71	1.25	0.54	-0.760563
H178	female	Han	non-majoring sport	Inner Mongolia Normal University	168.7	168.3	-0.4	0.00237107	74.3	70.9	-3.4	0.0457604	4.69	5.64	0.95	-0.202559	5.38	5.45	0.07	-0.0130112	1.48	1.78	0.3	-0.202703	2.91	3.57	0.66	-0.226804	1.79	1.63	-0.16	0.0893855
H180	female	Han	non-majoring sport	Inner Mongolia Normal University	160.7	160.7	0	0	49.3	49.41	0.11	-0.00223124	3.48	4.56	1.08	-0.310345	5.04	5.82	0.78	-0.154762	1.87	2.16	0.29	-0.15508	1.83	2.4	0.57	-0.311475	0.91	1.09	0.18	-0.197802
H181	female	Han	non-majoring sport	Inner Mongolia Normal University	170.5	170.5	0	0	53.3	54.9	1.6	-0.0300188	3.86	4.61	0.75	-0.194301	4.8	5.62	0.82	-0.170833	2.58	2.78	0.2	-0.0775194	1.86	2.21	0.35	-0.188172	0.99	0.88	-0.11	0.111111
H182	female	Han	non-majoring sport	Inner Mongolia Normal University	166.5	167.5	1	-0.00600601	71.6	67.6	-4	0.0558659	4.38	4.69	0.31	-0.0707763	5.62	5.87	0.25	-0.044484	1.82	1.91	0.09	-0.0494505	2.62	2.92	0.3	-0.114504	1.2	1.04	-0.16	0.133333
H185	female	Han	non-majoring sport	Inner Mongolia Normal University	161.3	161.3	0	0	48.9	47.7	-1.2	0.0245399	5.27	5.44	0.17	-0.0322581	0.65	6.13	5.48	-8.43077	2.09	2.1	0.01	-0.00478469	3.13	3.28	0.15	-0.0479233	1.11	1.24	0.13	-0.117117
H186	female	Han	non-majoring sport	Inner Mongolia Normal University	165	164.5	-0.5	0.0030303	49.9	49.5	-0.4	0.00801603	5.13	5.01	-0.12	0.0233918	5.48	5.81	0.33	-0.060219	2.13	2.39	0.26	-0.122066	2.86	2.7	-0.16	0.0559441	0.81	1.04	0.23	-0.283951
H187	female	Han	non-majoring sport	Inner Mongolia Normal University	164.9	164.9	0	0	55.4	55.9	0.5	-0.00902527	4.12	4.72	0.6	-0.145631	5.14	5.67	0.53	-0.103113	2.42	2.67	0.25	-0.103306	2.21	2.51	0.3	-0.135747	0.9	0.89	-0.01	0.0111111
H188	female	Han	non-majoring sport	Inner Mongolia Normal University	156.2	156.2	0	0	44.1	44.5	0.4	-0.00907029	3.97	4.14	0.17	-0.0428212	5.03	5.9	0.87	-0.172962	1.89	2.39	0.5	-0.26455	2.02	2.06	0.04	-0.019802	1.38	0.75	-0.63	0.456522
H189	female	Han	non-majoring sport	Inner Mongolia Normal University	155.5	155.6	0.1	-0.000643087	69.8	69.8	0	0	4.08	3.6	-0.48	0.117647	5.43	7.04	1.61	-0.296501	1.23	1.08	-0.15	0.121951	2.64	2.25	-0.39	0.147727	1.46	1.92	0.46	-0.315068
H191	female	Han	non-majoring sport	Inner Mongolia Normal University	163.2	163.2	0	0	54.3	55.6	1.3	-0.0239411	4.88	5.16	0.28	-0.057377	5.13	6.14	1.01	-0.196881	1.8	2.08	0.28	-0.155556	3	2.95	-0.05	0.0166667	2.01	1.93	-0.08	0.039801
H192	female	Han	non-majoring sport	lanzhou city college	165.6	165	-0.6	0.00362319	50.6	53.5	2.9	-0.0573123	4.35	4.67	0.32	-0.0735632	4.25	5.06	0.81	-0.190588	1.92	2.4	0.48	-0.25	2.35	2.19	-0.16	0.0680851	0.92	0.84	-0.08	0.0869565
H193	female	Han	non-majoring sport	lanzhou city college	163.8	164	0.2	-0.001221	62.2	65.5	3.3	-0.0530547	3.91	4.38	0.47	-0.120205	3.78	5.26	1.48	-0.391534	1.36	1.82	0.46	-0.338235	2.35	2.07	-0.28	0.119149	2.36	1.53	-0.83	0.351695
H194	female	Han	non-majoring sport	lanzhou city college	158	157.8	-0.2	0.00126582	56.8	53.9	-2.9	0.0510563	5.38	5.18	-0.2	0.0371747	4.98	5.86	0.88	-0.176707	1.6	1.94	0.34	-0.2125	3.19	2.68	-0.51	0.159875	2.49	1.37	-1.12	0.449799
H196	female	Han	non-majoring sport	lanzhou city college	151.7	152.2	0.5	-0.00329598	52.7	56.3	3.6	-0.0683112	3.25	3.61	0.36	-0.110769	4.67	5.14	0.47	-0.100642	1.17	1.68	0.51	-0.435897	2.06	1.86	-0.2	0.0970874	1.04	0.87	-0.17	0.163462
H197	female	Han	non-majoring sport	lanzhou city college	156.4	156.5	0.1	-0.000639386	53.8	57	3.2	-0.0594796	4.34	3.75	-0.59	0.135945	4.01	4.88	0.87	-0.216958	1.62	1.63	0.01	-0.00617284	2.58	1.84	-0.74	0.286822	1.27	1.58	0.31	-0.244094
H198	female	Han	non-majoring sport	lanzhou city college	163.1	164	0.9	-0.00551809	59.6	58	-1.6	0.0268456	4.12	3.92	-0.2	0.0485437	4.03	5.33	1.3	-0.322581	1.67	2	0.33	-0.197605	2.45	1.79	-0.66	0.269388	0.94	0.71	-0.23	0.244681
H200	female	Han	non-majoring sport	lanzhou city college	155.9	155.3	-0.6	0.00384862	53.1	55.3	2.2	-0.0414313	3.29	3.23	-0.06	0.0182371	4.24	4.67	0.43	-0.101415	1.4	1.74	0.34	-0.242857	1.93	1.44	-0.49	0.253886	0.88	0.61	-0.27	0.306818
H201	female	Han	non-majoring sport	lanzhou city college	158	159	1	-0.00632911	48	50	2	-0.0416667	4.07	4.14	0.07	-0.017199	3.55	5.53	1.98	-0.557746	1.8	2.13	0.33	-0.183333	2.13	1.85	-0.28	0.131455	1.07	0.92	-0.15	0.140187
H202	female	Han	non-majoring sport	lanzhou city college	166.5	165.1	-1.4	0.00840841	54	52.2	-1.8	0.0333333	4.37	4.77	0.4	-0.0915332	4.47	5.58	1.11	-0.248322	1.56	2.11	0.55	-0.352564	2.65	2.43	-0.22	0.0830189	0.72	0.51	-0.21	0.291667
H203	female	Han	non-majoring sport	lanzhou city college	158.5	159.1	0.6	-0.00378549	65.7	67.2	1.5	-0.0228311	5.05	5.3	0.25	-0.049505	4.34	5.83	1.49	-0.343318	1.09	1.86	0.77	-0.706422	2.97	2.81	-0.16	0.0538721	2.26	1.06	-1.2	0.530973
H204	female	Han	non-majoring sport	lanzhou city college	158	159	1	-0.00632911	45.4	46.3	0.9	-0.0198238	3.26	4.02	0.76	-0.233129	4.54	5.74	1.2	-0.264317	1.3	1.83	0.53	-0.407692	1.93	1.88	-0.05	0.0259067	0.87	0.74	-0.13	0.149425
H205	female	Han	non-majoring sport	lanzhou city college	153.9	153.2	-0.7	0.00454841	60	62.5	2.5	-0.0416667	4.1	4.53	0.43	-0.104878	5.19	5.22	0.03	-0.00578035	1.15	1.66	0.51	-0.443478	2.68	2.39	-0.29	0.108209	1.72	1.95	0.23	-0.133721
H206	female	Han	non-majoring sport	lanzhou city college	159.5	157.8	-1.7	0.0106583	51.5	52.5	1	-0.0194175	3.27	2.94	-0.33	0.100917	2.85	4.37	1.52	-0.533333	1.63	1.85	0.22	-0.134969	1.72	1.22	-0.5	0.290698	1.34	0.83	-0.51	0.380597
H207	female	Han	non-majoring sport	lanzhou city college	157.3	156.3	-1	0.00635728	50.3	48.5	-1.8	0.0357853	3.55	3.35	-0.2	0.056338	3.46	5.2	1.74	-0.50289	1.66	2.15	0.49	-0.295181	1.9	1.49	-0.41	0.215789	1.32	0.9	-0.42	0.318182
H208	female	Han	non-majoring sport	lanzhou city college	154.9	155.7	0.8	-0.00516462	54.6	56.2	1.6	-0.029304	3.7	3.8	0.1	-0.027027	3.94	5.03	1.09	-0.27665	1.26	1.54	0.28	-0.222222	2.21	1.72	-0.49	0.221719	1.09	1.23	0.14	-0.12844
H209	female	Han	non-majoring sport	lanzhou city college	166	168	2	-0.0120482	60.9	61	0.1	-0.00164204	3.37	2.9	-0.47	0.139466	3.94	5.01	1.07	-0.271574	1.29	1.3	0.01	-0.00775194	2.08	1.45	-0.63	0.302885	1.04	0.84	-0.2	0.192308
H210	female	Han	non-majoring sport	lanzhou city college	157.9	158.6	0.7	-0.00443319	46.1	48.1	2	-0.0433839	4.15	3.86	-0.29	0.0698795	4.13	4.72	0.59	-0.142857	1.71	2.22	0.51	-0.298246	2.26	1.68	-0.58	0.256637	1.12	0.76	-0.36	0.321429
H211	female	Han	non-majoring sport	lanzhou city college	156.5	156.1	-0.4	0.00255591	46.9	50.2	3.3	-0.0703625	3.09	3.39	0.3	-0.0970874	4.12	4.98	0.86	-0.208738	1.24	1.56	0.32	-0.258065	1.89	1.63	-0.26	0.137566	0.99	1.03	0.04	-0.040404
H212	female	Han	non-majoring sport	lanzhou city college	170	171.2	1.2	-0.00705882	65.7	65.7	0	0	3.97	3.53	-0.44	0.110831	4.34	5.47	1.13	-0.260369	1.36	1.53	0.17	-0.125	2.39	1.7	-0.69	0.288703	1.08	0.89	-0.19	0.175926
H213	female	Han	non-majoring sport	lanzhou city college	158	157	-1	0.00632911	44.9	43.4	-1.5	0.0334076	3.46	3.77	0.31	-0.0895954	4.03	4.55	0.52	-0.129032	1.15	1.69	0.54	-0.469565	2.09	1.79	-0.3	0.143541	1.26	1.17	-0.09	0.0714286
H214	female	Han	non-majoring sport	lanzhou city college	164.5	164.7	0.2	-0.00121581	44.6	51	6.4	-0.143498	3.74	2.71	-1.03	0.275401	4.24	4.67	0.43	-0.101415	1.63	1.16	-0.47	0.288344	2.21	1.26	-0.95	0.429864	0.78	1.62	0.84	-1.07692
H215	female	Han	non-majoring sport	lanzhou city college	160.3	160	-0.3	0.00187149	45.6	46.7	1.1	-0.0241228	4.48	4.04	-0.44	0.0982143	3.87	4.73	0.86	-0.222222	2.16	2.17	0.01	-0.00462963	2.29	1.79	-0.5	0.218341	1.32	1.14	-0.18	0.136364
H216	female	Han	non-majoring sport	lanzhou city college	162	161.8	-0.2	0.00123457	65.4	69.5	4.1	-0.0626911	4.28	3.89	-0.39	0.0911215	3.8	5.07	1.27	-0.334211	1.59	2	0.41	-0.257862	2.58	1.78	-0.8	0.310078	1.28	1.12	-0.16	0.125
H217	female	Han	non-majoring sport	lanzhou city college	157.2	157.4	0.2	-0.00127226	63.1	62.4	-0.7	0.0110935	4.41	4.64	0.23	-0.0521542	3.89	4.7	0.81	-0.208226	1.56	1.87	0.31	-0.198718	2.77	2.19	-0.58	0.209386	1.58	2.21	0.63	-0.398734
H218	female	Han	non-majoring sport	lanzhou city college	152.4	152.4	0	0	50.1	54.4	4.3	-0.0858283	3.63	4.14	0.51	-0.140496	4.36	5.19	0.83	-0.190367	1.19	1.86	0.67	-0.563025	2.38	2.05	-0.33	0.138655	0.91	0.57	-0.34	0.373626
H219	female	Han	non-majoring sport	lanzhou city college	166.5	166.9	0.4	-0.0024024	67	73.5	6.5	-0.0970149	3.19	3.52	0.33	-0.103448	3.46	4.71	1.25	-0.361272	1.36	1.91	0.55	-0.404412	1.81	1.69	-0.12	0.0662983	1.16	0.77	-0.39	0.336207
H220	female	Han	non-majoring sport	lanzhou city college	149.5	149.3	-0.2	0.00133779	46.2	46	-0.2	0.004329	3.04	2.77	-0.27	0.0888158	4.21	4.95	0.74	-0.175772	0.76	1.2	0.44	-0.578947	1.99	1.36	-0.63	0.316583	1.59	1.32	-0.27	0.169811
H221	female	Han	non-majoring sport	lanzhou city college	165.7	164.7	-1	0.006035	51.5	55.2	3.7	-0.0718447	3.7	3.22	-0.48	0.12973	4.35	5.21	0.86	-0.197701	1.63	1.59	-0.04	0.0245399	1.84	1.41	-0.43	0.233696	1.21	0.99	-0.22	0.181818
H222	female	Han	non-majoring sport	lanzhou city college	161.2	161.1	-0.1	0.000620347	43.2	44.8	1.6	-0.037037	3.75	3.97	0.22	-0.0586667	4.18	4.91	0.73	-0.174641	1.47	1.88	0.41	-0.278912	2.14	1.88	-0.26	0.121495	1.5	1.39	-0.11	0.0733333
H223	female	Han	non-majoring sport	lanzhou city college	162.5	163	0.5	-0.00307692	62.5	63	0.5	-0.008	4.01	3.79	-0.22	0.0548628	4.99	5.44	0.45	-0.0901804	1.4	1.76	0.36	-0.257143	2.54	1.85	-0.69	0.271654	1.53	1.32	-0.21	0.137255
H224	female	Han	non-majoring sport	lanzhou city college	164.3	165.1	0.8	-0.00486914	58.2	59.5	1.3	-0.0223368	3.45	3.26	-0.19	0.0550725	4.53	4.99	0.46	-0.101545	1.28	1.6	0.32	-0.25	2.15	1.59	-0.56	0.260465	1.04	0.67	-0.37	0.355769
H225	female	Han	non-majoring sport	lanzhou city college	159.9	160.5	0.6	-0.00375235	48.2	49	0.8	-0.0165975	3.74	3.54	-0.2	0.0534759	4.09	5.09	1	-0.244499	1.08	1.4	0.32	-0.296296	2.38	1.7	-0.68	0.285714	1.71	1.46	-0.25	0.146199
H226	female	Han	non-majoring sport	lanzhou city college	157.9	158.5	0.6	-0.00379987	42.1	42.7	0.6	-0.0142518	4.39	4.53	0.14	-0.0318907	4.13	4.52	0.39	-0.094431	1.37	1.7	0.33	-0.240876	2.51	2.25	-0.26	0.103586	1.24	1.58	0.34	-0.274194
H227	female	Han	non-majoring sport	lanzhou city college	157.8	158.1	0.3	-0.00190114	52.2	53.4	1.2	-0.0229885	3.8	4.6	0.8	-0.210526	3.82	4.37	0.55	-0.143979	1.28	1.68	0.4	-0.3125	2.36	2.42	0.06	-0.0254237	1.23	1.15	-0.08	0.0650407
H228	female	Han	non-majoring sport	lanzhou city college	163.1	163.1	0	0	53.4	52.6	-0.8	0.0149813	3.31	3.34	0.03	-0.00906344	4.11	4.89	0.78	-0.189781	1.64	1.86	0.22	-0.134146	1.79	1.43	-0.36	0.201117	1.13	0.85	-0.28	0.247788
H229	male	Han	non-majoring sport	lanzhou city college	174	173.8	-0.2	0.00114943	58.8	58.3	-0.5	0.0085034	3.34	3.06	-0.28	0.0838323	3.93	5.23	1.3	-0.330789	1.05	1.2	0.15	-0.142857	2.32	1.5	-0.82	0.353448	1	0.97	-0.03	0.03
H230	male	Han	non-majoring sport	lanzhou city college	172	172.7	0.7	-0.00406977	61.6	61.2	-0.4	0.00649351	4.25	3.69	-0.56	0.131765	4.29	5.29	1	-0.2331	1.42	1.72	0.3	-0.211268	2.77	1.79	-0.98	0.353791	1.02	0.85	-0.17	0.166667
H231	male	Han	non-majoring sport	lanzhou city college	169.8	170.1	0.3	-0.00176678	84.8	87	2.2	-0.0259434	5.91	5.58	-0.33	0.0558376	5.01	5.37	0.36	-0.0718563	1.51	1.71	0.2	-0.13245	3.7	2.92	-0.78	0.210811	2.43	2.43	0	0
H232	male	Han	non-majoring sport	lanzhou city college	168.4	168.7	0.3	-0.00178147	52	54.8	2.8	-0.0538462	3.65	3.66	0.01	-0.00273973	4.08	5.14	1.06	-0.259804	1.06	1.36	0.3	-0.283019	2.52	1.9	-0.62	0.246032	1.15	1.1	-0.05	0.0434783
H233	male	Han	non-majoring sport	lanzhou city college	161.4	162.1	0.7	-0.00433705	53.9	54.7	0.8	-0.0148423	3.03	3.61	0.58	-0.191419	4.09	6.16	2.07	-0.506112	1.39	1.74	0.35	-0.251799	1.85	1.7	-0.15	0.0810811	0.96	1.65	0.69	-0.71875
H235	male	Han	non-majoring sport	lanzhou city college	171.9	172	0.1	-0.000581734	60.4	59.8	-0.6	0.00993377	3.95	3.7	-0.25	0.0632911	4.65	6.15	1.5	-0.322581	1.73	1.92	0.19	-0.109827	2.3	1.73	-0.57	0.247826	1.37	0.73	-0.64	0.467153
H236	male	Han	non-majoring sport	lanzhou city college	159.1	158.6	-0.5	0.00314268	55.8	59	3.2	-0.0573477	4.36	3.96	-0.4	0.0917431	4.55	5.28	0.73	-0.16044	1.72	2.03	0.31	-0.180233	2.71	2	-0.71	0.261993	1	1.08	0.08	-0.08
H237	male	Han	non-majoring sport	lanzhou city college	181.7	179.3	-2.4	0.0132086	68.3	68.3	0	0	4.3	4.2	-0.1	0.0232558	4.46	5.51	1.05	-0.235426	1.51	1.88	0.37	-0.245033	2.79	2.12	-0.67	0.240143	1.2	0.93	-0.27	0.225
H238	male	Han	non-majoring sport	lanzhou city college	168.4	169.6	1.2	-0.00712589	50.9	50.4	-0.5	0.00982318	4.12	4.05	-0.07	0.0169903	4.33	5.47	1.14	-0.263279	1.83	1.92	0.09	-0.0491803	2.17	1.8	-0.37	0.170507	1.44	1.33	-0.11	0.0763889
H239	male	Han	non-majoring sport	lanzhou city college	166.3	166.6	0.3	-0.00180397	50	50.5	0.5	-0.01	3.98	3.47	-0.51	0.128141	0.72	5.71	4.99	-6.93056	1.64	1.84	0.2	-0.121951	2.33	1.59	-0.74	0.317597	2.2	0.96	-1.24	0.563636
H240	male	Han	non-majoring sport	lanzhou city college	163.3	164.1	0.8	-0.00489896	54	57.3	3.3	-0.0611111	3.42	3.63	0.21	-0.0614035	4.34	5.43	1.09	-0.251152	1.35	1.53	0.18	-0.133333	2.12	1.75	-0.37	0.174528	0.69	1.01	0.32	-0.463768
H241	male	Han	non-majoring sport	lanzhou city college	171	172.6	1.6	-0.00935673	65	67.8	2.8	-0.0430769	4.45	5.49	1.04	-0.233708	3.79	5.44	1.65	-0.435356	1.37	2.04	0.67	-0.489051	2.57	2.64	0.07	-0.0272374	1.3	2.27	0.97	-0.746154
H242	male	Han	non-majoring sport	lanzhou city college	172.2	172.1	-0.1	0.00058072	69.8	68.5	-1.3	0.0186246	3.63	3.25	-0.38	0.104683	4.21	5.5	1.29	-0.306413	1.08	1.57	0.49	-0.453704	2.21	1.63	-0.58	0.262443	1.86	1.04	-0.82	0.44086
H243	male	Han	non-majoring sport	lanzhou city college	179.8	178.4	-1.4	0.00778643	66	69.3	3.3	-0.05	2.87	3.58	0.71	-0.247387	0.71	4.95	4.24	-5.97183	1.28	1.66	0.38	-0.296875	1.65	1.78	0.13	-0.0787879	0.98	1.1	0.12	-0.122449
H244	male	Han	non-majoring sport	lanzhou city college	173	173.1	0.1	-0.000578035	62.4	62.9	0.5	-0.00801282	2.18	2.5	0.32	-0.146789	4.09	5.55	1.46	-0.356968	0.84	1.41	0.57	-0.678571	1.45	1.15	-0.3	0.206897	0.71	0.66	-0.05	0.0704225
H246	male	Han	non-majoring sport	lanzhou city college	177	177.7	0.7	-0.0039548	60.1	60.8	0.7	-0.0116473	4.56	4.74	0.18	-0.0394737	4.42	4.95	0.53	-0.11991	1.61	2.12	0.51	-0.31677	2.8	2.35	-0.45	0.160714	1.1	0.75	-0.35	0.318182
H247	male	Han	non-majoring sport	lanzhou city college	178.1	178.9	0.8	-0.00449186	65.2	65	-0.2	0.00306748	3.82	3.81	-0.01	0.0026178	3.65	5.51	1.86	-0.509589	1.11	1.34	0.23	-0.207207	2.62	2.14	-0.48	0.183206	1.4	1.47	0.07	-0.05
H248	male	Han	non-majoring sport	lanzhou city college	168.4	168.4	0	0	65.6	64.5	-1.1	0.0167683	3.51	3.41	-0.1	0.02849	4.35	5.45	1.1	-0.252874	0.7	1.15	0.45	-0.642857	2.24	1.71	-0.53	0.236607	2.61	2.12	-0.49	0.187739
H249	male	Han	non-majoring sport	lanzhou city college	158.2	158.5	0.3	-0.00189633	53	52.5	-0.5	0.00943396	3.54	3.43	-0.11	0.0310734	4.38	6.26	1.88	-0.429224	1.17	1.63	0.46	-0.393162	2.25	1.7	-0.55	0.244444	0.85	0.68	-0.17	0.2
H251	male	Han	non-majoring sport	lanzhou city college	173	173.2	0.2	-0.00115607	72.3	72.7	0.4	-0.0055325	4.35	3.7	-0.65	0.149425	4.02	5.68	1.66	-0.412935	0.74	1.04	0.3	-0.405405	2.91	1.84	-1.07	0.367698	2.26	2.98	0.72	-0.318584
H252	male	Han	non-majoring sport	lanzhou city college	176	176.5	0.5	-0.00284091	64.4	66.8	2.4	-0.0372671	4.3	2.5	-1.8	0.418605	4.39	5.77	1.38	-0.314351	1.17	1.63	0.46	-0.393162	2.78	1.04	-1.74	0.625899	1.81	0.55	-1.26	0.696133
H253	male	Han	non-majoring sport	lanzhou city college	172.7	173.3	0.6	-0.00347423	60.8	60.8	0	0	3.28	4.5	1.22	-0.371951	4.55	5.55	1	-0.21978	1.24	1.66	0.42	-0.33871	1.91	2.23	0.32	-0.167539	0.98	1.75	0.77	-0.785714
H254	male	Han	non-majoring sport	lanzhou city college	183.5	183.7	0.2	-0.00108992	69.4	71.7	2.3	-0.0331412	3.75	3.09	-0.66	0.176	4.51	5.88	1.37	-0.303769	1.36	1.44	0.08	-0.0588235	2.33	1.49	-0.84	0.360515	1.33	1.37	0.04	-0.0300752
H255	male	Han	non-majoring sport	lanzhou city college	171.9	173.1	1.2	-0.0069808	67.9	67	-0.9	0.0132548	2.72	3.95	1.23	-0.452206	4.19	5.37	1.18	-0.281623	1.01	1.59	0.58	-0.574257	1.8	2.07	0.27	-0.15	1.11	0.96	-0.15	0.135135
H256	male	Han	non-majoring sport	lanzhou city college	169.9	166.7	-3.2	0.0188346	51	51	0	0	2.34	3.62	1.28	-0.547009	3.16	5.84	2.68	-0.848101	1.05	2.11	1.06	-1.00952	1.29	1.54	0.25	-0.193798	0.75	1.03	0.28	-0.373333
H257	male	Han	non-majoring sport	lanzhou city college	173	171	-2	0.0115607	63.9	63	-0.9	0.0140845	3.73	4.22	0.49	-0.131367	4.46	5.61	1.15	-0.257848	1.4	2.17	0.77	-0.55	2	1.88	-0.12	0.06	1.32	1.19	-0.13	0.0984848
H258	male	Han	non-majoring sport	lanzhou city college	175.1	175.6	0.5	-0.00285551	68.9	67.5	-1.4	0.0203193	3.85	3.54	-0.31	0.0805195	4.66	5.84	1.18	-0.253219	0.63	1.17	0.54	-0.857143	2.61	1.84	-0.77	0.295019	1.99	1.89	-0.1	0.0502513
H259	male	Han	non-majoring sport	lanzhou city college	172.3	170.6	-1.7	0.00986651	60.5	60.2	-0.3	0.00495868	3.57	3.58	0.01	-0.00280112	3.99	5.26	1.27	-0.318296	1.23	1.61	0.38	-0.308943	2.12	1.75	-0.37	0.174528	1.14	0.86	-0.28	0.245614
